# Supplementary material for: A nested real-time PCR assay for the quantification of Plasmodium falciparum DNA extracted from dried blood spots
Source: PubMed Central journal article supplement (PMC4197274; doi:10.1186/1475-2875-13-393), 2014-10-04

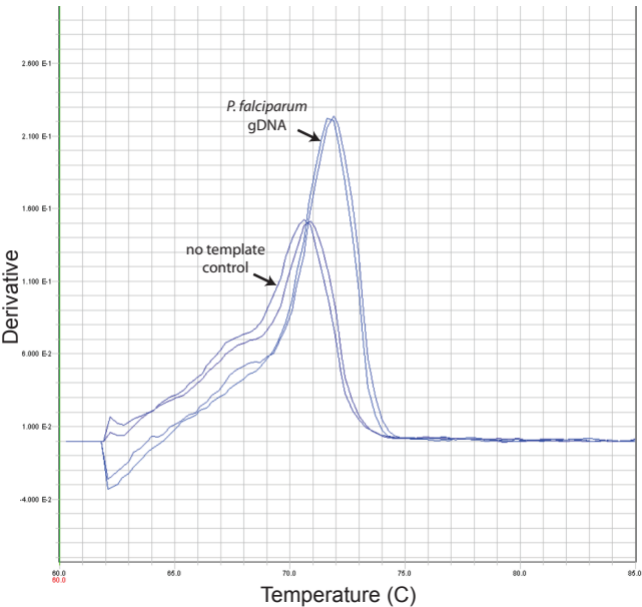

Supplement: 12936_2014_3556_MOESM1_ESM.pdf [file 12936_2014_3556_MOESM1_ESM.pdf]
